# Supplementary material
Source: HighWire-hosted journal article supplement (https://tsaco.bmj.com/content/9/1/e001214)
Supplement: inline-supplementary-material-1 [file inline-supplementary-material-1.pdf]

Supplementary Table 1. Standards for Reporting Diagnostic accuracy studies (STARD) 2015 checklist.(10)

| SESSION & Topic   | No  | Item                                                                                                                                                   | Reported on page #        |
|-------------------|-----|--------------------------------------------------------------------------------------------------------------------------------------------------------|---------------------------|
| TITLE OR ABSTRACT | 1   | Identification as a study of diagnostic accuracy using at least one measure of accuracy (such as sensitivity, specificity, predictive values, or AUC)  | 1-4 Title and Abstract    |
| ABSTRACT          | 2   | Structured summary of study design, methods, results, and conclusions (for specific guidance, see STARD for Abstracts)                                 | 3-4 Abstract              |
| INTRODUCTION      | 3   | Scientific and clinical background, including the intended use and clinical role of the index test                                                     | 6-7 Introduction          |
|                   | 4   | Study objectives and hypotheses                                                                                                                        | 6-7 Introduction          |
| METHODS           |     |                                                                                                                                                        |                           |
| Study design      | 5   | Whether data collection was planned before the index test and reference standard were performed (prospective study) or after (retrospective study)     | 8-10 Methods              |
| Participants      | 6   | Eligibility criteria                                                                                                                                   | 8-10 Methods              |
|                   | 7   | On what basis potentially eligible participants were identified (such as symptoms, results from previous tests, inclusion in registry)                 | 8-10 Methods              |
|                   | 8   | Where and when potentially eligible participants were identified (setting, location and dates)                                                         | 8-10 Methods              |
|                   | 9   | Whether participants formed a consecutive, random or convenience series                                                                                | 8-10 Methods              |
| Test methods      | 10a | Index test, in sufficient detail to allow replication                                                                                                  | 8-10 Methods              |
|                   | 10b | Reference standard, in sufficient detail to allow replication                                                                                          | 8-10 Methods              |
|                   | 11  | Rationale for choosing the reference standard (if alternatives exist)                                                                                  | 6-7 Introduction          |
|                   | 12a | Definition of and rationale for test positivity cut-offs or result categories of the index test, distinguishing pre-specified from exploratory         | 8-10 Methods, Table 1     |
|                   | 12b | Definition of and rationale for test positivity cut-offs or result categories of the reference standard, distinguishing pre-specified from exploratory | 8-10 Methods              |
|                   | 13a | Whether clinical information and reference standard results were available to the performers/readers of the index test                                 | 8-10 Methods              |
|                   | 13b | Whether clinical information and index test results were available to the assessors of the reference standard                                          | 8-10 Methods              |
| Analysis          | 14  | Methods for estimating or comparing measures of diagnostic accuracy                                                                                    | 8-10 Methods              |
|                   | 15  | How indeterminate index test or reference standard results were handled                                                                                | NA                        |
|                   | 16  | How missing data on the index test and reference standard were handled                                                                                 | NA                        |
|                   | 17  | Any analyses of variability in diagnostic accuracy, distinguishing pre-specified from exploratory                                                      | 8-10 Methods              |
|                   | 18  | Intended sample size and how it was determined                                                                                                         | NA                        |
| RESULTS           |     |                                                                                                                                                        |                           |
| Participants      | 19  | Flow of participants, using a diagram                                                                                                                  | 11-12 Results, no diagram |
|                   | 20  | Baseline demographic and clinical characteristics of participants                                                                                      | 11-12 Results, Table 1    |
|                   | 21a | Distribution of severity of disease in those with the target condition                                                                                 | 11-13 Results             |
|                   | 21b | Distribution of alternative diagnoses in those without the target condition                                                                            | 11-13 Results             |
|                   | 22  | Time interval and any clinical interventions between index test and reference standard                                                                 | NA                        |
| Test results      | 23  | Cross tabulation of the index test results (or their distribution) by the results of the reference standard                                            | 11-13 Results, Table 2    |
|                   | 24  | Estimates of diagnostic accuracy and their precision (such as 95% confidence intervals)                                                                | 11-13 Results, Table 2    |
|                   | 25  | Any adverse events from performing the index test or the reference standard                                                                            | NA                        |
| DISCUSSION        | 26  | Study limitations, including sources of potential bias, statistical uncertainty, and generalisability                                                  | 14-18 Discussion          |
|                   | 27  | Implications for practice, including the intended use and clinical role of the index test                                                              | 14-18 Discussion          |
| OTHER INFORMATION | 28  | Registration number and name of registry                                                                                                               | 8, Methods                |
|                   | 29  | Where the full study protocol can be accessed                                                                                                          | NA                        |
|                   | 30  | Sources of funding and other support; role of funders                                                                                                  | 19                        |
